# Supplementary material for: Trapping and manipulating skyrmions in two-dimensional films by surface acoustic waves
Source: Research Square preprint supplement (doi:10.21203/rs.3.rs-2093394/v1), 2022-10-25
Supplement: Supplementary file 1 [file a21c9ab9fa976de58f2eac7d.pdf]

# Supplementary Information for “Trapping and manipulating skyrmions in two-dimensional films by surface acoustic waves”

Yu Miyazaki,<sup>1,\*</sup> Tomoyuki Yokouchi,<sup>2</sup> and Yuki Shiomi<sup>2</sup>

<sup>1</sup>*Department of Applied Physics, The University of Tokyo,  
Hongo, Bunkyo, Tokyo 113-8656, Japan*

<sup>2</sup>*Department of Basic Science, The University of Tokyo,  
Komaba, Meguro, Tokyo 153-8902, Japan*

(Dated: September 22, 2022)

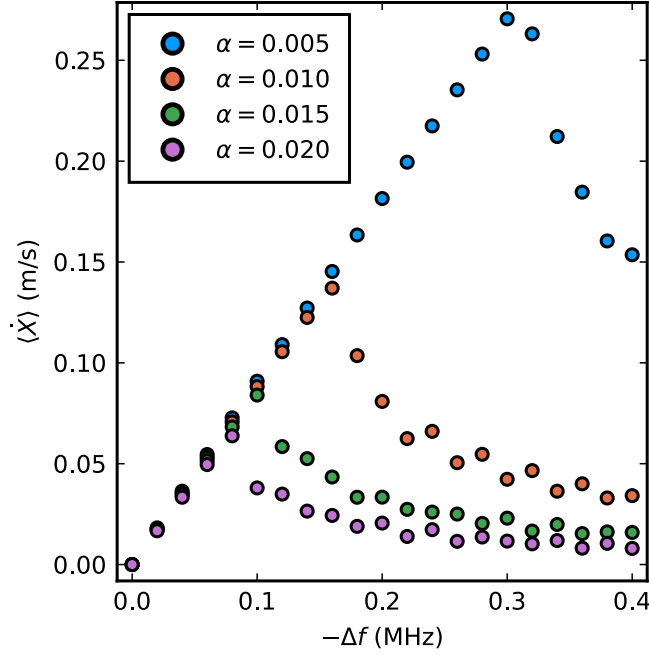

FIG. S1. Averaged velocity of skyrmion along the  $x$  direction  $\langle \dot{X} \rangle$  as a function of the amplitude of detuning  $\Delta f_x$  with different Gilbert damping constants  $\alpha$ . Other parameters and calculation conditions are the same as those shown in Fig. 4 in the main text.

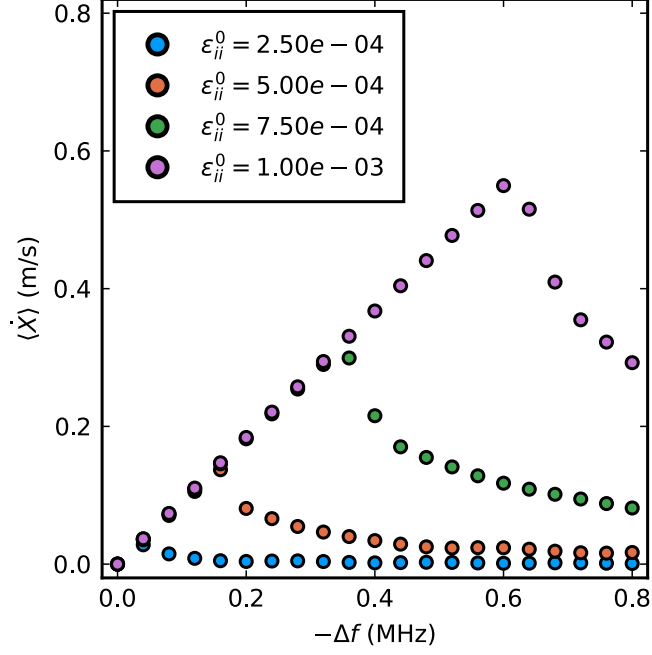

FIG. S2. Averaged velocity of skyrmion along the  $x$  direction  $\langle \dot{X} \rangle$  as a function of the amplitude of detuning  $\Delta f_x$  with different magnitudes of strain  $\epsilon_{xx}^0$ . Other parameters and calculation conditions are the same as those shown in Fig. 4 in the main text.

---

\* yumiyaazaki@g.ecc.u-tokyo.ac.jp
